# Supplementary material
Source: MDPI journal article supplement (https://www.mdpi.com/2076-3417/10/14/4925)
Supplement: s1 [file s1]

# Supplementary Materials: Design, Simulation, and Test of A New Threshing Cylinder for High Moisture Content Corn

Xiaoyu Li, Yuefeng Du, Jinglin Guo and Enrong Mao

As a supplement and pictures of the experiment was enclosed.

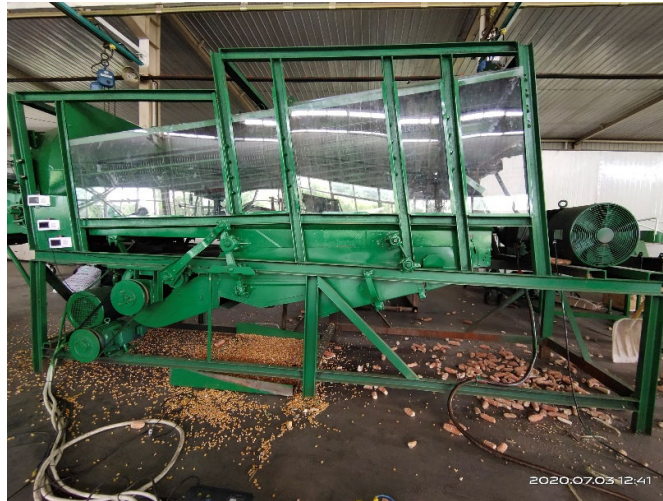

**Figure 1.** Platform of Corn Threshing and Cleaning Experiment.

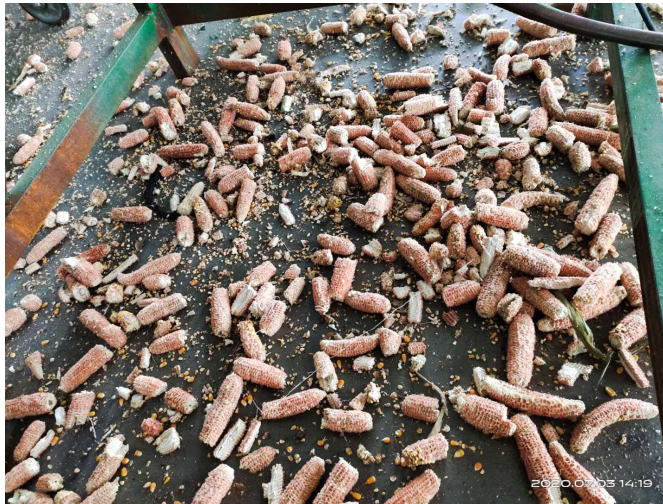

**Figure 2.** Mixture Distribution After Experiment.
